# Supplementary material for: Alternative splicing liberates a cryptic cytoplasmic isoform of mitochondrial MECR that antagonizes influenza virus
Source: bioRxiv or medRxiv preprint supplement (doi:10.1101/2020.11.09.355982), 2022-10-07
Supplement: Supplementary file [file media-3.pdf]

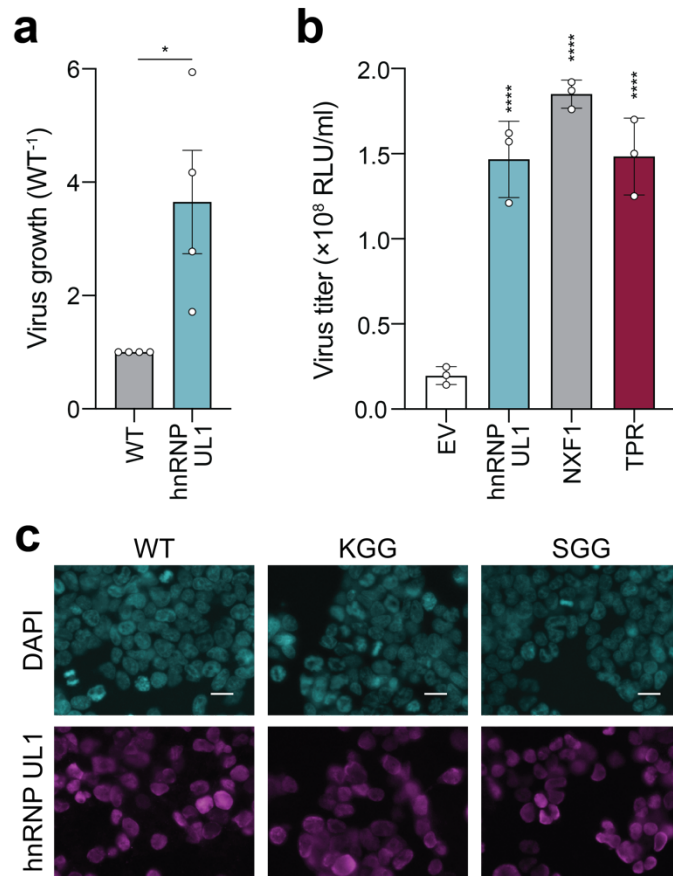

**Supp. Fig. 3: Enhanced expression of nuclear mRNA export proteins increases virus production.** **a** (related to **Fig. 3b**), Viral titers were measured from wildtype or clonal A549 hnRNP UL1-V5 cells infected with WSN NLuc (MOI, 0.05; 24 h). Mean  $\pm$  SEM of  $n = 4$  replicate experiments. Paired one-tailed t test; \*,  $P < 0.05$ . **b**, Replication of WSN NLuc (MOI, 0.05; 24 h) was measured in 293T cells transfected with empty vector (EV) or with plasmids encoding the indicated RNA export proteins. Mean  $\pm$  SD of  $n = 3$ . One-way ANOVA with *post hoc* Dunnett's multiple comparisons test; \*\*\*\*,  $P < 0.0001$ . **c**, Immunofluorescence microscopy of WT and mutant hnRNP UL1 expressed in 293T cells, scale bar indicates 20  $\mu$ m.
