# Supplementary material for: Alternative splicing liberates a cryptic cytoplasmic isoform of mitochondrial MECR that antagonizes influenza virus
Source: bioRxiv or medRxiv preprint supplement (doi:10.1101/2020.11.09.355982), 2022-10-07
Supplement: Supplementary file [file media-4.pdf]

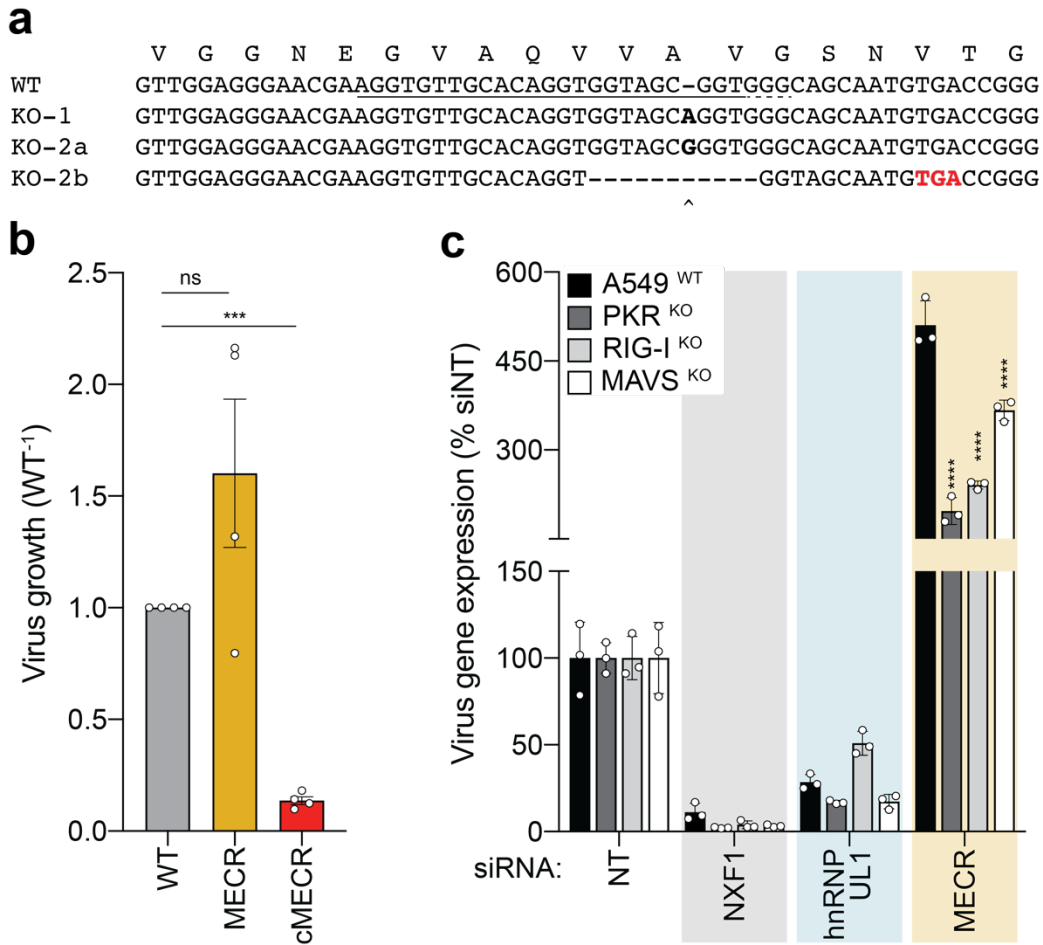

**Supp. Fig. 4: Characterization of MECR knockout A549 cells and impact of siRNA knockdown on innate immune deficient cells. a.** Allelic identity of *MECR* knockout cells. CRISPR gRNA sequence underlined, PAM dotted. In-frame amino acids indicated on top. KO-1 is homozygous and KO-2 has two distinct alleles. **b.** (related to Fig. 5d), Viral titers were measured from wildtype or clonal A549 MECR and cMECR-V5 cells infected with WSN NLuc (MOI, 0.05; 24 h). Mean  $\pm$  SEM of  $n = 4$  replicate experiments. One-way ANOVA with *post hoc* Dunnett's multiple comparisons test; \*\*\*,  $P < 0.001$ ; ns, not significant. **c.** MECR antiviral effect is potentiated by innate immune signaling. siRNA-treated WT or *PKR*, *RIG-I*, or *MAVS* knockout A549 cells were infected with WSN NLuc (MOI, 0.05). Viral titers were measured 24 h post infection and normalized to NT controls. Mean  $\pm$  SD of  $n = 3$ . Two-way ANOVA with *post hoc* Dunnett's multiple comparisons test to compare to WT cells; \*\*\*\*,  $P < 0.0001$ ; other conditions were not significant.
