# Supplementary material for: Alternative splicing liberates a cryptic cytoplasmic isoform of mitochondrial MECR that antagonizes influenza virus
Source: bioRxiv or medRxiv preprint supplement (doi:10.1101/2020.11.09.355982), 2022-10-07
Supplement: Supplementary file [file media-6.pdf]

**Supp. Table 4.** Accession numbers for MECR homologs

| Common Name          | Species                             | GenBank ID     |
|----------------------|-------------------------------------|----------------|
| Human                | <i>Homo sapiens</i>                 | NP_057095.4    |
| Chimpanzee           | <i>Pan paniscus</i>                 | XP_003828155.1 |
| Gorilla              | <i>Gorilla gorilla gorilla</i>      | XP_004025368.3 |
| Rhesus macaque       | <i>Macaca mulatta</i>               | NP_001248098.1 |
| Pale spear-nosed bat | <i>Phyllostomus discolor</i>        | XP_028368816.1 |
| American bison       | <i>Bison bison bison</i>            | XP_010828514.1 |
| Cow                  | <i>Bos taurus</i>                   | NP_858055.1    |
| Pig                  | <i>Sus scrofa</i>                   | NP_001231011.1 |
| Horse                | <i>Equus caballus</i>               | XP_001503984.3 |
| Beluga whale         | <i>Delphinapterus leucas</i>        | XP_022407680.2 |
| Camel                | <i>Camelus ferus</i>                | XP_006175527.1 |
| Alpaca               | <i>Vicugna pacos</i>                | XP_031539466.1 |
| Mouse                | <i>Mus musculus</i>                 | NP_079573.2    |
| Chicken              | <i>Gallus gallus</i>                | XP_024998883.1 |
| Goose                | <i>Anser cygnoides domesticus</i>   | XP_013050980.1 |
| Duck                 | <i>Anas platyrhynchos</i>           | XP_027299737.1 |
| Saker falcon         | <i>Falco cherrug</i>                | XP_027668811.1 |
| Golden eagle         | <i>Aquila chrysaetos chrysaetos</i> | XP_029895600.1 |
| Alligator            | <i>Alligator mississippiensis</i>   | KYO48103.1     |
| Salmon               | <i>Salmo salar</i>                  | XP_014055905.1 |
| Trout                | <i>Salmo trutta</i>                 | XP_029592657.1 |
| Zebrafish            | <i>Danio rerio</i>                  | AAI53449.1     |
| Frog                 | <i>Xenopus tropicalis</i>           | NP_001016371.1 |
| Slime mold           | <i>Cavenderia fasciculata</i>       | EGG24996.1     |
| Nematode             | <i>Trichinella spiralis</i>         | KRY41102.1     |
| Baker's yeast        | <i>Saccharomyces cerevisiae</i>     | QHB06797.1     |
